# Supplementary material for: Medication Use among Immigrants from Syria Living in Western Norway: A Cross-Sectional Study
Source: MDPI journal article supplement (doi:10.3390/pharma1020008), 2022-09-01
Supplement: s1 [file s1]

Archive with 1 entries (1 files):
- pharmacoepidemiology-1712132-supplementary.pdf
